# Supplementary material for: Aerogel for Highly Efficient Photocatalytic Degradation
Source: MDPI journal article supplement (doi:10.3390/gels10020100), 2024-01-26
Supplement: s1 [file s1]

# Supporting Information

## Aerogel for Highly Efficient Photocatalytic Degradation

Xue-Chun Yang <sup>1</sup>, Jing-Tai Zhao <sup>2\*</sup>

<sup>1</sup> School of Environmental and Chemical Engineering, Shanghai University, Shanghai 200444, P. R. China

<sup>2</sup> School of Materials Science and Engineering, Guilin University of Electronic Technology, Guilin 541004, P. R. China

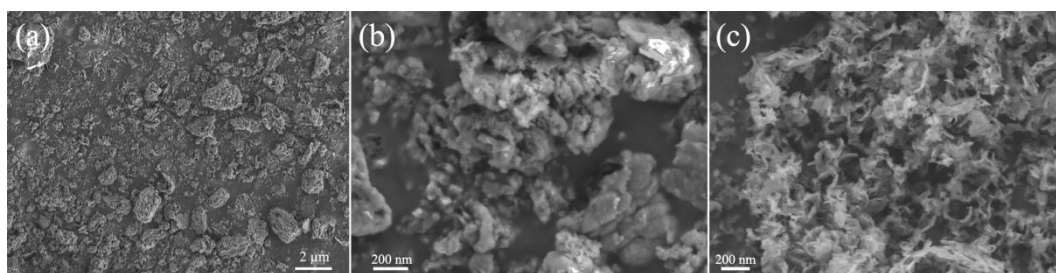

**Figure S1.** The SEM images of (a) 1-g-C<sub>3</sub>N<sub>4</sub>, (b) 2-g-C<sub>3</sub>N<sub>4</sub> and (c) 3-g-C<sub>3</sub>N<sub>4</sub>.

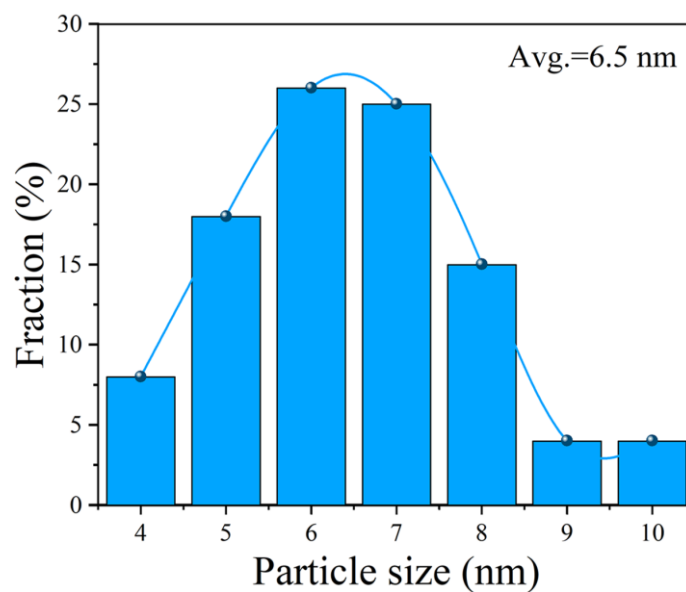

**Figure S2.** Particle size distribution diagram of the CDs.

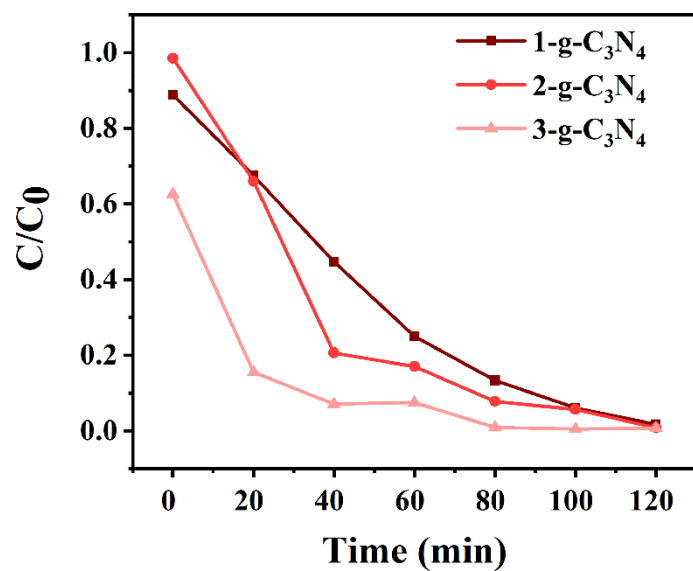

Figure S3. The photocatalytic degradation curve of g-C<sub>3</sub>N<sub>4</sub>.

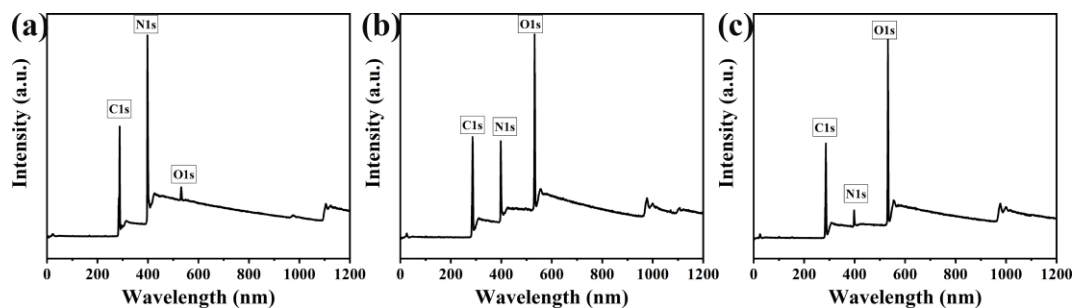

Figure S4. The survey XPS spectrum of (a) g-C<sub>3</sub>N<sub>4</sub>, (b) Agar/g-C<sub>3</sub>N<sub>4</sub> aerogel and (c) Agar/CDs-g-C<sub>3</sub>N<sub>4</sub> aerogel.

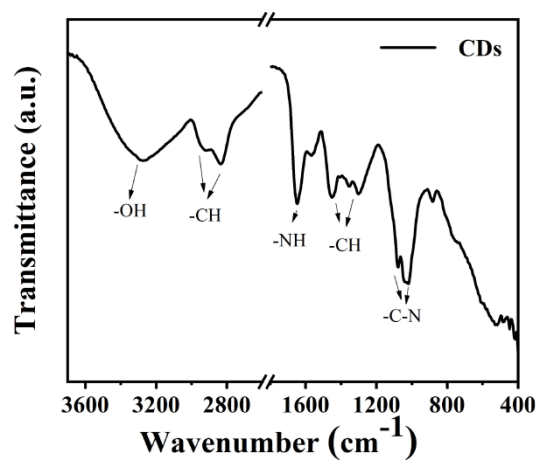

Figure S5. The FTIR spectrum of CDs.
